# Supplementary material
Source: PubMed Central journal article supplement (PMC6024640)
Supplement: blood809822-suppl1.pdf [file blood809822-suppl1.pdf]

Supplemental Figures

Supplemental Figure 1: Representative flow plots and gating. Gating strategy and identification of A) B cell subsets in peripheral blood: CD19<sup>+</sup> IgD<sup>+</sup> CD27<sup>+</sup> unswitched memory B cells, CD19<sup>+</sup> IgD<sup>-</sup> CD27<sup>+</sup> switched memory B cells, CD19<sup>+</sup> CD24<sup>hi</sup> CD38<sup>hi</sup> transitional B cells, CD19<sup>+</sup> CD24<sup>hi</sup> CD38<sup>lo</sup> marginal-zone-like B cells; B) T follicular helper cells and Tfh subsets in peripheral blood: CD4<sup>+</sup> CD45RA<sup>-</sup> CXCR5<sup>+</sup> T follicular helper (Tfh) cells, CXCR3<sup>+</sup> CCR6<sup>-</sup> Th1-like Tfh, CXCR3<sup>-</sup> CCR6<sup>-</sup> Th2-like Tfh, CXCR3<sup>-</sup> CCR6<sup>+</sup> Th17-like Tfh; C) plasmablasts after in vitro culture with CD40L and IL-21-Fc. For plasmablasts, the percentage of CD27<sup>+</sup> CD38<sup>hi</sup> within CD19<sup>+</sup> cells was recorded and verified with the percentage of CD19<sup>med</sup> CD38<sup>hi</sup> cells within CD19<sup>+</sup> cells.

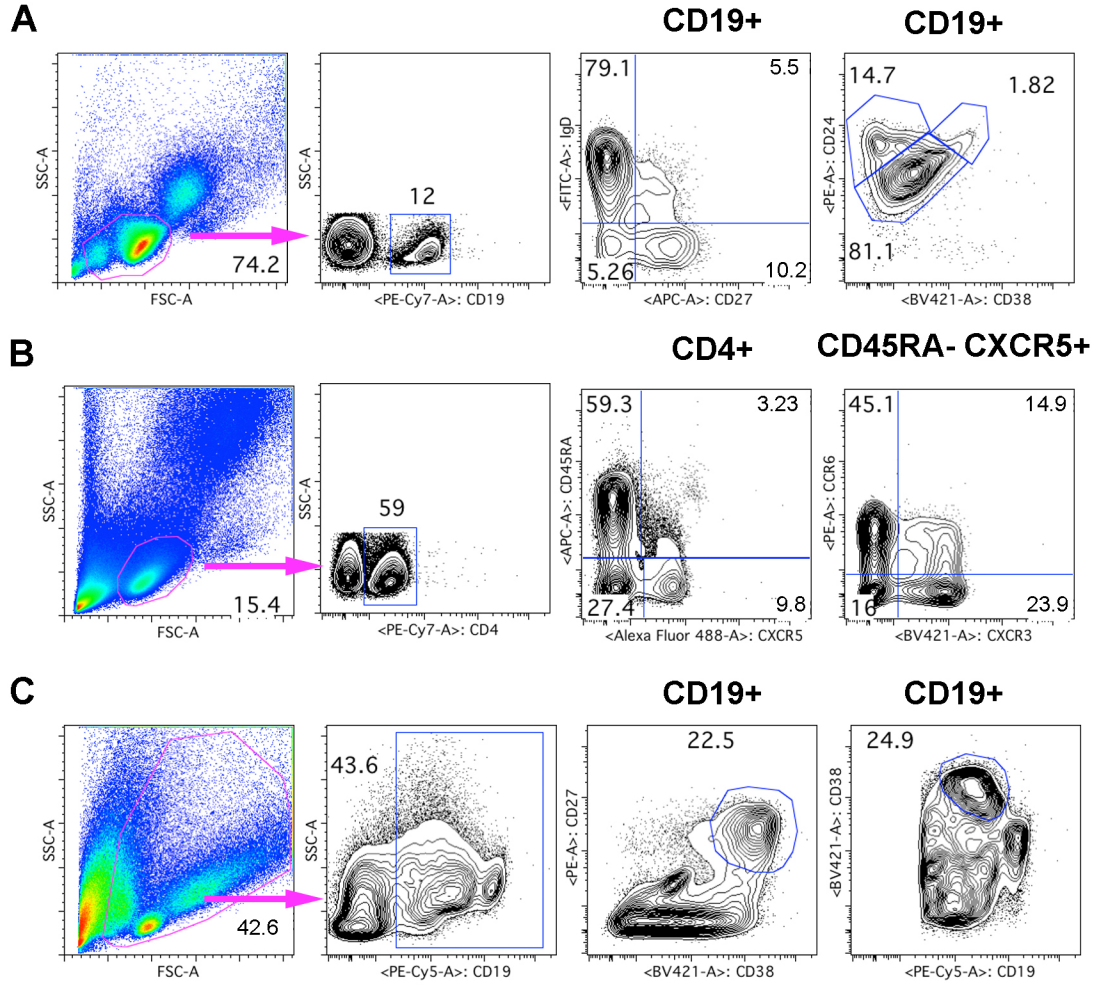

Supplemental Figure 2: Percent donor chimerism in the indicated cell types in patients with IL2RG/JAK3 SCID after allogeneic transplant performed without (open symbols) or with conditioning (closed symbols). Median chimerism is indicated by bars. Comparison according to conditioning was performed by Mann-Whitney test within each cell type, T cell  $p=0.0530$ , B cell  $p=0.0008$ , myeloid  $p=0.1273$ .

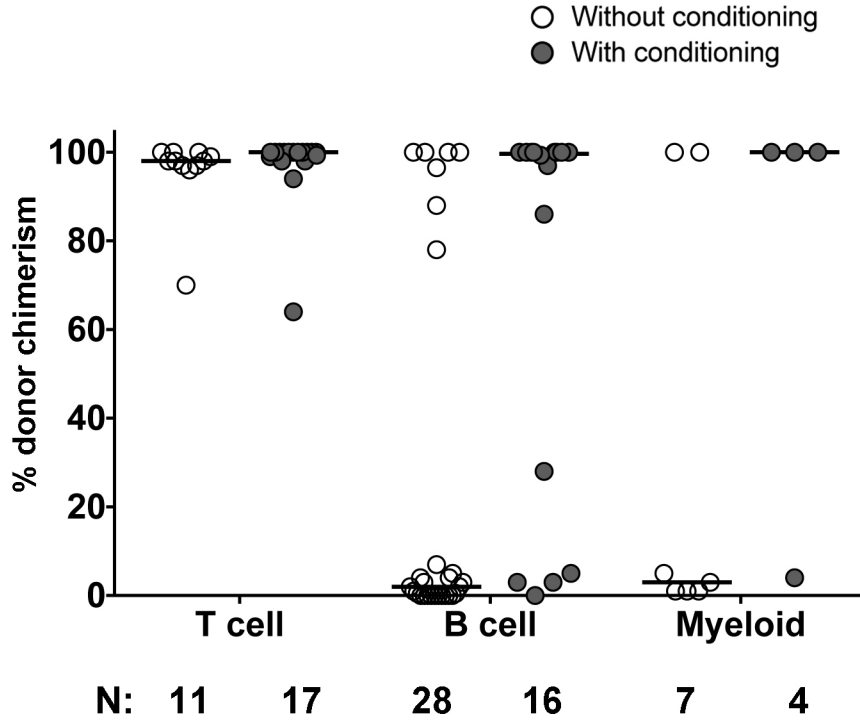

Supplemental Figure 3: Naïve CD4 T cell percentage in healthy adults, healthy children, and patients post-HSCT. Percentage of CD4<sup>+</sup> T cells expressing CD45RA (% CD4<sup>+</sup> CD45RA<sup>+</sup>) is depicted for healthy adults, healthy children and for patients according to conditioning regimen including A) all patients or B) divided in categories by years post-HSCT. Medians and interquartile ranges are shown. Brackets depict comparisons with significant p values, \* p<0.05, \*\* p<0.01, \*\*\* p<0.001, \*\*\*\* p<0.0001. In B, comparisons within age groups (2-5y post-HSCT compared to pediatric controls or >12y post-HSCT compared to adult controls) and comparisons between conditioning groups within an age group did not reach statistical significance.

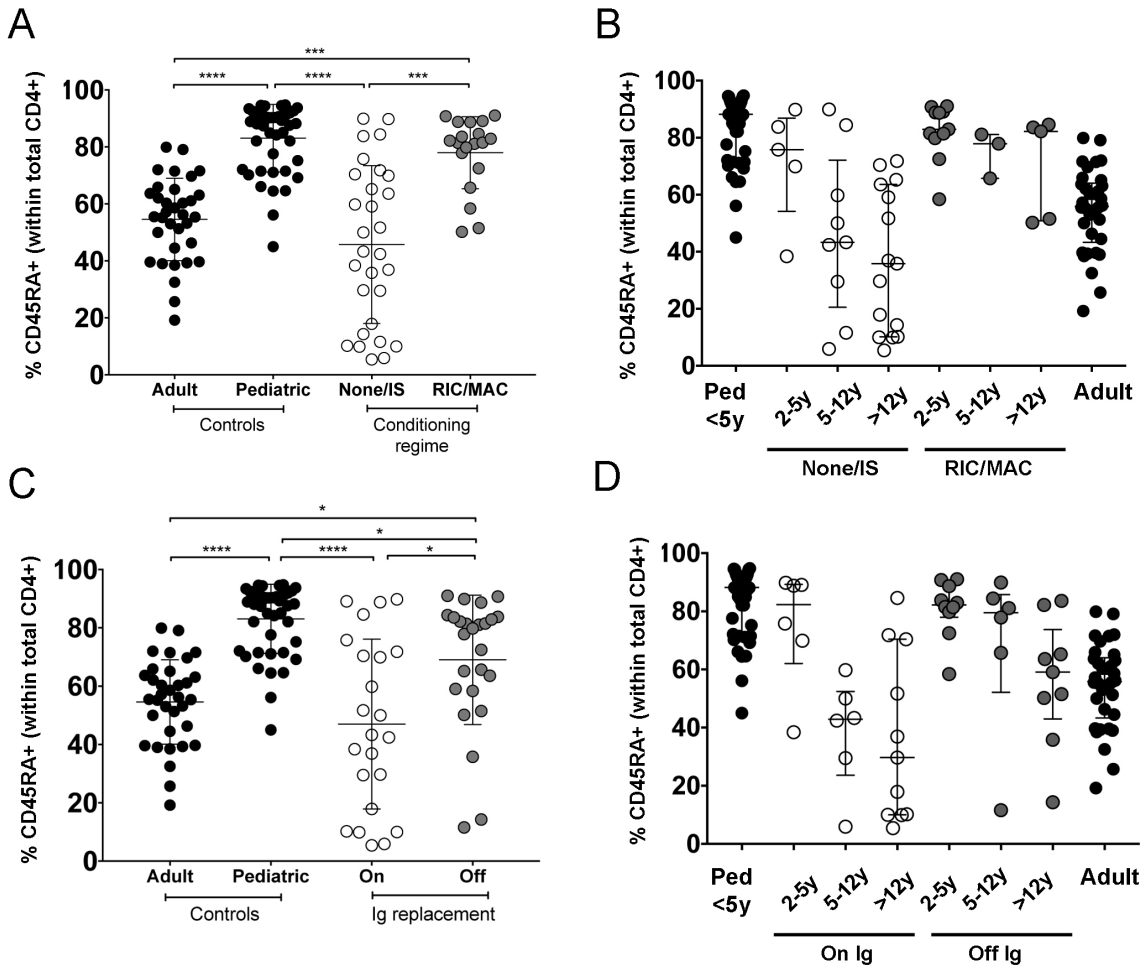

Supplemental Figure 4: Percentage of T<sub>FH</sub> within non-naïve CD4 T cells is stable with age/time post-HSCT. T<sub>FH</sub> measured as the percentage of CXCR5+ cells within total CD4 was correlated with age in healthy children (A) or with time post-HSCT in patients (B). T<sub>FH</sub> measured as the percentage of CXCR5+ cells within non-naïve CD4 T cells (CD4+ CD45RA- T cells) was correlated with age in healthy children (C) or with time post-HSCT in patients (D). Results of Spearman r correlation are shown.

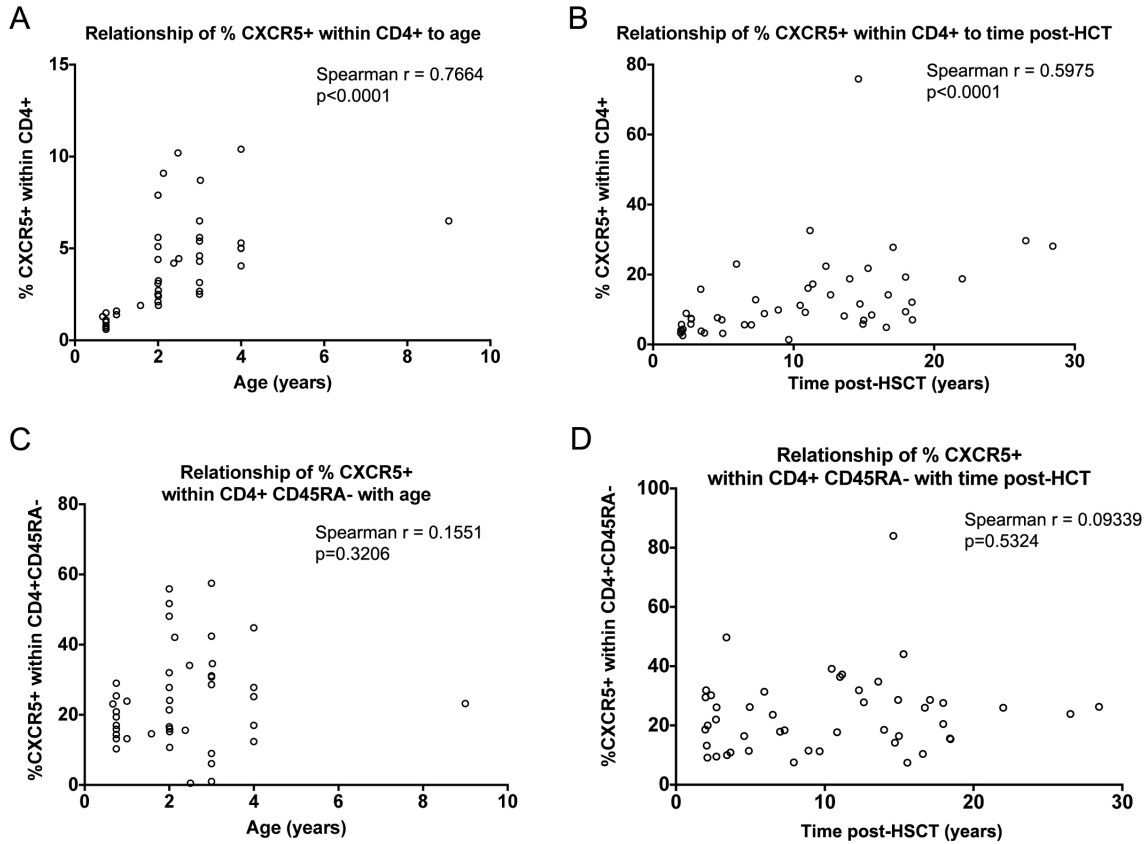

Supplemental Figure 5: T<sub>FH</sub> subsets in healthy children and adults, and in patients post-HSCT. Subsets of T<sub>FH</sub> were identified according to the expression of CXCR3 and CCR6. A) Percentages of Th1, Th2 and Th17 T<sub>FH</sub> in adults (closed circles) and children (open circles). Percentages of Th1, Th2 and Th17 T<sub>FH</sub> in patients post-HSCT were compared to healthy adults (closed circles) and divided according to B) conditioning, C) Ig replacement status, D) response to tetanus vaccine. Medians and interquartile ranges are in red. Results of Kruskal-Wallis comparisons are shown, \* p<0.05, \*\* p<0.01. Comparisons between patients (None/IS versus RIC/MAC, On Ig versus Off Ig, vaccine response Not tested versus Detectable versus Protective) were all nonsignificant.

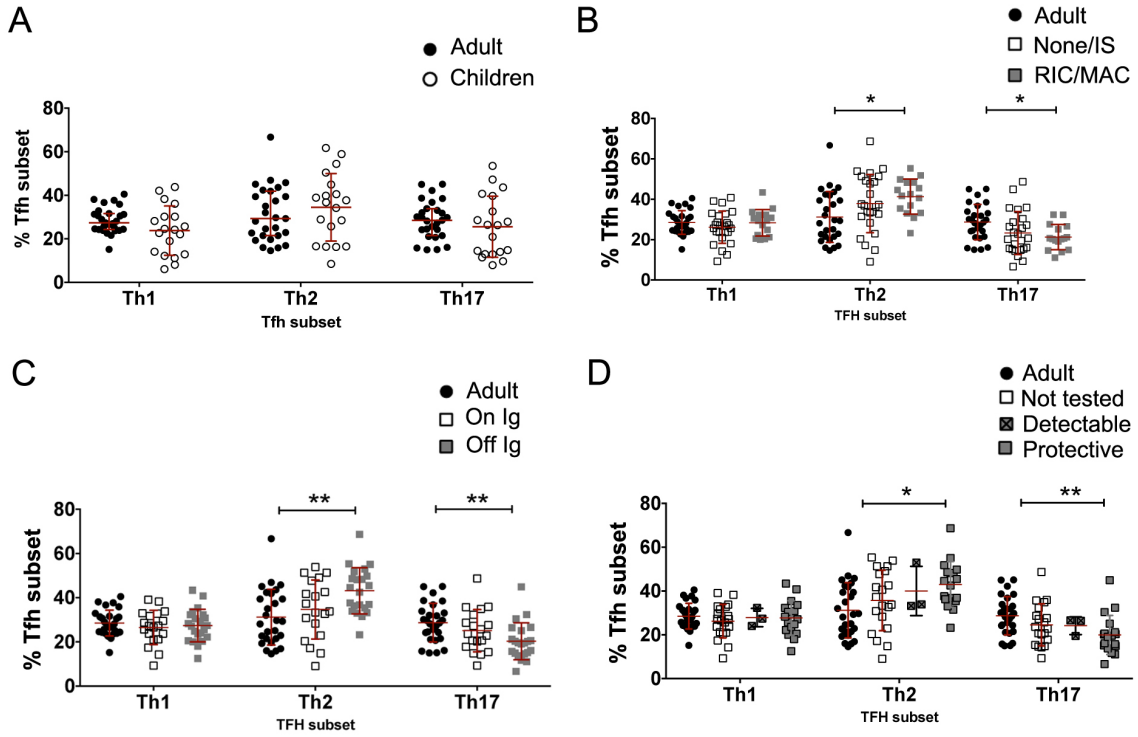

Supplemental Figure 6: Unswitched memory B cells, transitional B cells and marginal zone-like B cells in patients post-HSCT. Percentage of unswitched memory B cells (the percentage of CD19<sup>+</sup> B cells that are IgD<sup>+</sup> and CD27<sup>+</sup>), transitional B cells (the percentage of CD19<sup>+</sup> B cells that are CD24<sup>hi</sup> and CD38<sup>hi</sup>), and marginal zone-like B cells (the percentage of CD19<sup>+</sup> B cells that are CD24<sup>hi</sup> and CD38<sup>lo</sup>) were measured in patients with IL2RG/JAK3 SCID and analyzed according to A-C) conditioning, D-F) donor B cell chimerism, G-I) Ig replacement status, J-L) response to tetanus vaccine. Controls were combined from healthy adults and children. Medians and interquartile ranges are shown. Brackets depict comparisons with significant p values, \* p<0.05, \*\* p<0.01, \*\*\* p<0.001, \*\*\*\* p<0.0001.

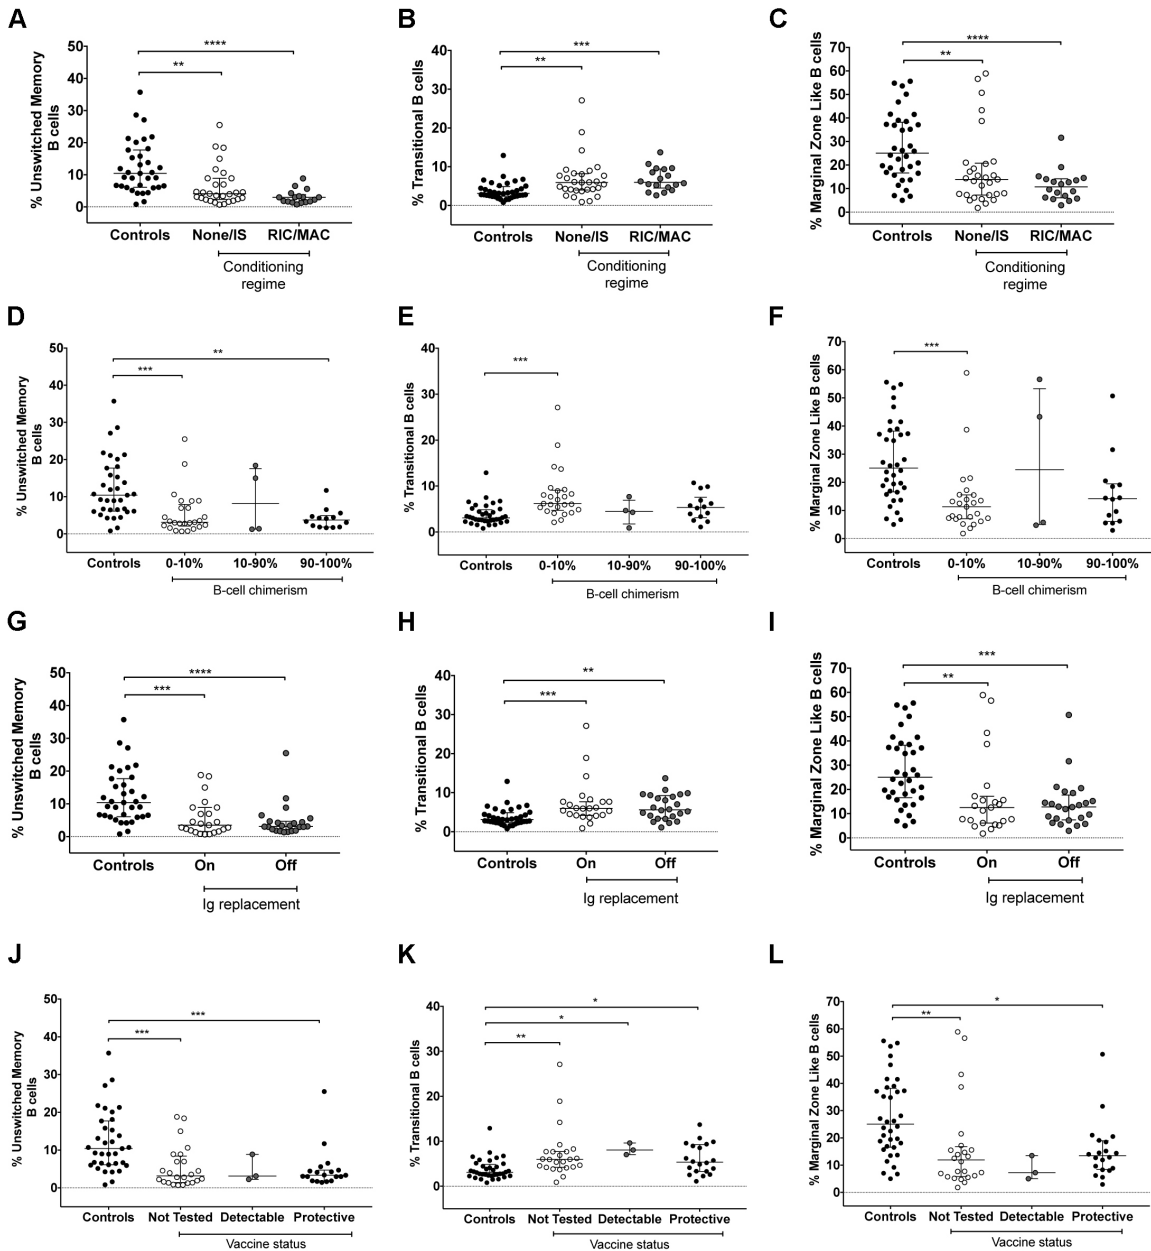

**Supplemental Table 1: Mutations, donor B cell chimerism and immune function of patients studied (n=48)**

| Pt no | Gene  | Nucleotide change                 | Protein change | Mutation type  | % Donor B cell chimerism | Ig replacement | Vaccine response |
|-------|-------|-----------------------------------|----------------|----------------|--------------------------|----------------|------------------|
| 1     | IL2RG | c.270G>A                          | p.W90X         | nonsense       | 0                        | On             | Not Tested       |
| 2     | IL2RG | c.975C>G                          | p.Y325X        | nonsense       | 0                        | On             | Not Tested       |
| 3     | IL2RG | c.562C>T                          | p.Q188X        | nonsense       | 0                        | On             | Not Tested       |
| 4     | IL2RG | c.17T>A                           | p.L6X          | nonsense       | 3                        | On             | Not Tested       |
| 5     | IL2RG | c.562C>T                          | p.Q188X        | nonsense       | 78                       | On             | Not Tested       |
| 6     | IL2RG | c.775insTTTG                      | p.A259Vfs*44   | frameshift     | 2                        | On             | Not Tested       |
| 7     | IL2RG | large deletion promoter to exon 5 |                | large deletion | 0                        | On             | Not Tested       |
| 8     | IL2RG | c.670C>T                          | p.R224W        | missense       | 0                        | On             | Not Tested       |
| 9     | IL2RG | c.458T>A                          | p.I153N        | missense       | 1                        | On             | Not Tested       |
| 10    | IL2RG | c.676C>T                          | p.R226C        | missense       | 2                        | On             | Not Tested       |
| 11    | IL2RG | c.664C>T                          | p.R222C        | missense       | 3                        | On             | Not tested       |
| 12    | IL2RG | c.695G>T                          | p.G232V        | missense       | 4                        | On             | Not Tested       |
| 13    | IL2RG | c.676C>T                          | p.R226C        | missense       | 5                        | On             | Not Tested       |
| 14    | IL2RG | c.676C>T                          | p.R226C        | missense       | 88                       | On             | Not Tested       |
| 15    | IL2RG | c.758-1 G>C                       |                | splice         | 0                        | On             | Not Tested       |
| 16    | IL2RG | c.454+1 G>A                       |                | splice         | 0                        | On             | Not Tested       |
| 17    | IL2RG | c.454+1 G>A                       |                | splice         | 0                        | On             | Not Tested       |
| 18    | IL2RG | c.595-1 G>C                       |                | splice         | 3                        | On             | Not Tested       |
| 19    | IL2RG | c.924+5 G>A                       |                | splice         | 4                        | On             | Not Tested       |
| 20    | IL2RG | c.854+2T>C                        |                | splice         | 100                      | On             | Not Tested       |
| 21    | IL2RG | c.924+2 T>G                       |                | splice         |                          | On             | Not Tested       |
| 22    | IL2RG | c.677G>A                          | p.R226H        | missense       | 28                       | Off            | Not Tested       |
| 23    | IL2RG | c.431A>C                          | p.Q144P        | missense       | 0                        | Off            | Detectable       |
| 24    | IL2RG | c.437T>C                          | p.L146P        | missense       | 0.5                      | Off            | Detectable       |
| 25    | IL2RG | c.737G>A                          | p.W246X        | nonsense       | 99.3                     | Off            | Protective       |
| 26    | IL2RG | c.710G>A                          | p.W237X        | nonsense       | 100                      | Off            | Protective       |
| 27    | IL2RG | c.908dupA                         | p.Y303X        | nonsense       | 100                      | Off            | Protective       |
| 28    | IL2RG | c.865C>T                          | p.R289X        | nonsense       | 100                      | Off            | Protective       |
| 29    | IL2RG | c.352C>T                          | p.Q118X        | nonsense       |                          | Off            | Protective       |
| 30    | IL2RG | c.737G>A                          | p.W246X        | nonsense       |                          | Off            | Protective       |
| 31    | IL2RG | c.865C>T                          | p.R289X        | nonsense       |                          | Off            | Protective       |
| 32    | IL2RG | c.151_163delAGTGTTCCTC            | p.S51Cfs*15    | frameshift     | 97                       | Off            | Protective       |

|           |       |                      |                  |                   |      |     |            |
|-----------|-------|----------------------|------------------|-------------------|------|-----|------------|
| <b>33</b> | IL2RG | c.374A>G             | p.Y125C          | missense          | 0    | Off | Protective |
| <b>34</b> | IL2RG | c.437T>C             | p.L146P          | missense          | 0.5  | Off | Protective |
| <b>35</b> | IL2RG | c.676C>T             | p.R226C          | missense          | 5    | Off | Protective |
| <b>36</b> | IL2RG | c.854G>A             | p.R285Q          | missense          | 100  | Off | Protective |
| <b>37</b> | IL2RG | c.677G>A             | p.R226H          | missense          | 100  | Off | Protective |
| <b>38</b> | IL2RG | c.395T>G             | p.L132R          | missense          | 100  | Off | Protective |
| <b>39</b> | IL2RG | c.314A>G             | p.Y105C          | missense          | 100  | Off | Protective |
| <b>40</b> | IL2RG | c.455(-1)G>A         |                  | splice            | 96.5 | Off | Protective |
| <b>41</b> | IL2RG | c.115+1 G>T          |                  | splice            | 100  | Off | Protective |
| <b>42</b> | IL2RG | c.758-1G>C           |                  | splice            | 100  | Off | Protective |
| <b>43</b> | JAK3  | c.1580_1585delTGGGCC | p.L527_G528del   | in-frame deletion | 86   | On  | Not Tested |
| <b>44</b> | JAK3  | c.507C>A, c.1569G>A  | p.D169E, p.W523X | missense          | 0    | On  | Not Tested |
| <b>45</b> | JAK3  | c.314-1G>C           |                  | splice            | 3    | Off | Detectable |
| <b>46</b> | JAK3  | c.1245_1248delCTGT   | p.C415Pfs*6      | frameshift        | 100  | Off | Protective |
| <b>47</b> | JAK3  | c.578G>A, c.1786+3G  | p.C193Y, splice  | missense, splice  | 100  | Off | Protective |
| <b>48</b> | JAK3  | unknown              |                  | unknown           | 7    | Off | Protective |



**Supplemental Table 2: Adult and pediatric healthy control B cell phenotyping, plasmablast and Ig secretion data**

| <b>B cell subset</b>         | <b>Adult median (range)<br/>N=28 or 29</b> | <b>Pediatric median (range)<br/>N=7</b> | <b>P value<br/>(Mann<br/>Whitney)</b> |
|------------------------------|--------------------------------------------|-----------------------------------------|---------------------------------------|
| <b>Transitional</b>          | 2.79% (0.78-12.9%)                         | 3.41% (2.27-6.56%)                      | 0.5011                                |
| <b>Marginal zone like</b>    | 28.1% (5.02-55.6%)                         | 19.7% (15.7-27.1%)                      | 0.2058                                |
| <b>Unswitched memory</b>     | 10.7% (0.81-35.7%)                         | 8.92% (5.91-17.70%)                     | 0.4499                                |
| <b>Switched memory</b>       | 17.35% (7.11-31.7%)                        | 14.3% (7.34-34.9%)                      | 0.2268                                |
| <b>In vitro plasmablasts</b> | 24.35% (13.4-55%)                          | 22.5% (11.3-57%)                        | 0.7549                                |
| <b>IgM secretion</b>         | 17377 (9349-35756)                         | 26945 (13977-36950)                     | 0.2810                                |
| <b>IgG secretion</b>         | 11192 (5110-35912)                         | 20841 (10007-46686)                     | 0.0939                                |
